# Supplementary material for: Histone Acetyltransferase GCN5 Affects Auxin Transport during Root Growth by Modulating Histone Acetylation and Gene Expression of PINs
Source: MDPI journal article supplement (doi:10.3390/plants11243572), 2022-12-17
Supplement: s1 [file s1]

Supplemental Table 1. List of primers used in this study

| Experiment      | Target           | Primer sequence (5' – 3')     |
|-----------------|------------------|-------------------------------|
| Genotyping      | GCN5             | AGTGGGGGCACACTCGTTTCAAATTATTC |
|                 |                  | TTGAGATTTAGCACCAGATTGGAGACCTG |
|                 | <i>gcn5-1</i>    | CATTTTATAATAACGCTGCGGACATCTAC |
|                 |                  | TTGAGATTTAGCACCAGATTGGAGACCTG |
|                 | ADA2b            | ACTCCTCACAAATGTGATCACCCATACCG |
|                 |                  | CTCCATCTCCGCCAAGAGTTGCTCAG    |
|                 | <i>ada2b-1</i>   | CATTTTATAATAACGCTGCGGACATCTAC |
|                 |                  | CTCCATCTCCGCCAAGAGTTGCTCAG    |
| Gene Expression | mGFP             | TCAAGGAGGACGGAAACATC          |
|                 |                  | AAAGGGCAGATTGTGTGGAC          |
|                 | <i>At4G26410</i> | GAGCTGAAGTGGCTTCCATGA         |
|                 |                  | GGTCCGACATACCCATGATCC         |
|                 | <i>PIN1</i>      | TAAGGTGATGCCACCAACAA          |
|                 |                  | AGCTGGCATTTCATGTTCC           |
|                 | <i>PIN2</i>      | TGCCAACGATAATGAGTGGA          |
|                 |                  | ATTTTCCGCACGCAATAATC          |
|                 | <i>PIN3</i>      | GAGCACCTGACAACGATCAAG         |
|                 |                  | TCCACTTGCTGGATGAGCTAC         |
|                 | <i>PIN4</i>      | TGCTAAGGAGATTCCGATGG          |
|                 |                  | AAGACCGCCGATATCATCAC          |
|                 | <i>PIN7</i>      | TTCATCCCGCAATCTTGAGT          |
|                 |                  | ATCCTCTTCAGCCAAGCAGA          |
| ChIP-qPCR       | <i>PIN1</i> PR   | GCACCCATCAACCACCATTTT         |
|                 |                  | AGTGTGTGTGATGTAATTTTGATTGA    |
|                 | <i>PIN1</i> CR   | CTTTGGTCCTGGAGAAGCTG          |
|                 |                  | GGACCACCGTCTTCTTCGTA          |
|                 | <i>PIN3</i> PR   | TTGCTCACTCCACACACACA          |
|                 |                  | AACCGTTAAGCAACGGTGTC          |
|                 | <i>PIN3</i> CR   | CAAGTGGAGATTTCGGAGGA          |
|                 |                  | GGCGTCTTTTGGTCTCTCTG          |
|                 | <i>PIN4</i> PR   | CAACAGTGGCTTGGACCTAA          |
|                 |                  | TGGTACAAGAAGACAGCCACA         |
|                 | <i>PIN4</i> CR   | GTGATGATATCGGCGGTCTT          |
|                 |                  | TTCAGCCCTGCTGTAGCTTT          |
